# Supplementary material for: Amplified centrosomes and mitotic index display poor concordance between patient tumors and cultured cancer cells
Source: PubMed Central journal article supplement (PMC5341055; doi:10.1038/srep43984), 2017-03-08
Supplement: srep43984-s1.pdf [file srep43984-s1.pdf]

## **Supplementary Material**

### **Amplified centrosomes and mitotic index display poor concordance between patient tumors and cultured cancer cells**

Karuna Mittal<sup>1</sup>, Da Hoon Choi<sup>1</sup>, Angela Ogden<sup>1</sup>, Shashi Donthamsetty<sup>1</sup>, Brian D. Melton<sup>1</sup>, Meenakshi. V. Gupta<sup>2</sup>, Vaishali Pannu<sup>1</sup>, Guilherme Cantuaria<sup>3</sup>, Sooryanarayana Varambally<sup>4</sup>, Michelle D. Reid<sup>5</sup>, Kristin Jonsdottir<sup>6</sup>, Emiel A. M. Janssen<sup>6</sup>, Mohammad A. Aleskandarany<sup>7</sup>, Ian O. Ellis<sup>7</sup>, Emad A. Rakha<sup>7</sup>, Padmashree C. G. Rida<sup>1,8\*</sup>, Ritu Aneja<sup>1\*</sup>

#### **Detailed Description of Centrosome Aberrations Quantitation**

To evaluate the number of centrosomes in tumor samples per cell, we immunostained centrosomes in tissues (normal and tumor for respective cancer types) with anti- $\gamma$ -tubulin antibody and counterstained nuclei with DAPI. We imaged these tissue slides at low magnification (20x) employing LSM 700 confocal microscope to capture images of 10 fields of view that encompass several nuclei and centrosomes (Supplementary Fig. 1). For each field we selected a region with 30-35 clearly distinguishable nuclei and defined it as region of interest (ROI) by drawing a boundary around the outer edges of outermost nuclei in the ROI. Next we quantified the number and volume of  $\gamma$ -tubulin foci in each ROI at higher magnification (63X objective). In our study, we defined centrosome aberrations as numerical (dispersed and clustered) and structural aberrations (PCM). The “dispersed” configuration refers to cells with widely dispersed supernumerary centrosomes in interphase. On the other hand, “clustered” refers to cells with supernumerary

centrosomes assembled together in interphase (either individually distinguishable or clustered tightly). The third category, termed “PCM” comprised cells with centrosomes whose volumes were above-normal and were represented as only one  $\gamma$ -tubulin spot, not a cluster of  $\gamma$ -tubulin spots. Centrosome aberrations (CA) was calculated as a percentage by adding percent cells harboring more than two  $\gamma$ -tubulin foci and percent cells harboring  $\gamma$ -tubulin foci with volume greater than upper range of mean centrosomal volumes found in respective normal tissues (Supplementary Fig. 1). Since centrosomes pass through a duplication cycle that involves large volume changes, we needed to define a “normal range” for centrosomal volumes using both adjacent uninvolved tissue from cancer patients and normal tissue for disease-free individuals for each cancer type. To determine the normal range, we analyzed volumes of centrosomes (500 centrosomes for each sample) in adjacent uninvolved tissue from cancer patients (20 samples for each cancer type) and in normal tissues (20 normal tissue samples for breast, pancreas and bladder). Normal tissue samples were obtained from Biomax Inc. in the form of commercial tissue microarrays. We evaluated the volume of centrosomes by using the three-dimensional measurement module in the Zeiss imaging software. Mean volumes of centrosomes in normal breast, pancreatic and bladder epithelial cells ranged between 0.22-0.76  $\mu\text{m}^3$ , 0.20-0.56  $\mu\text{m}^3$ , and 0.20-0.74  $\mu\text{m}^3$ , respectively. The various centrosomal phenotypes observed in hypoxic conditions are represented in Supplementary Fig. 2 and 3. The presence of CA was confirmed via immunoblotting for CA-associated proteins as shown in Supplementary Fig. 4.

### Supplementary Figure - 1 (Aneja et al)

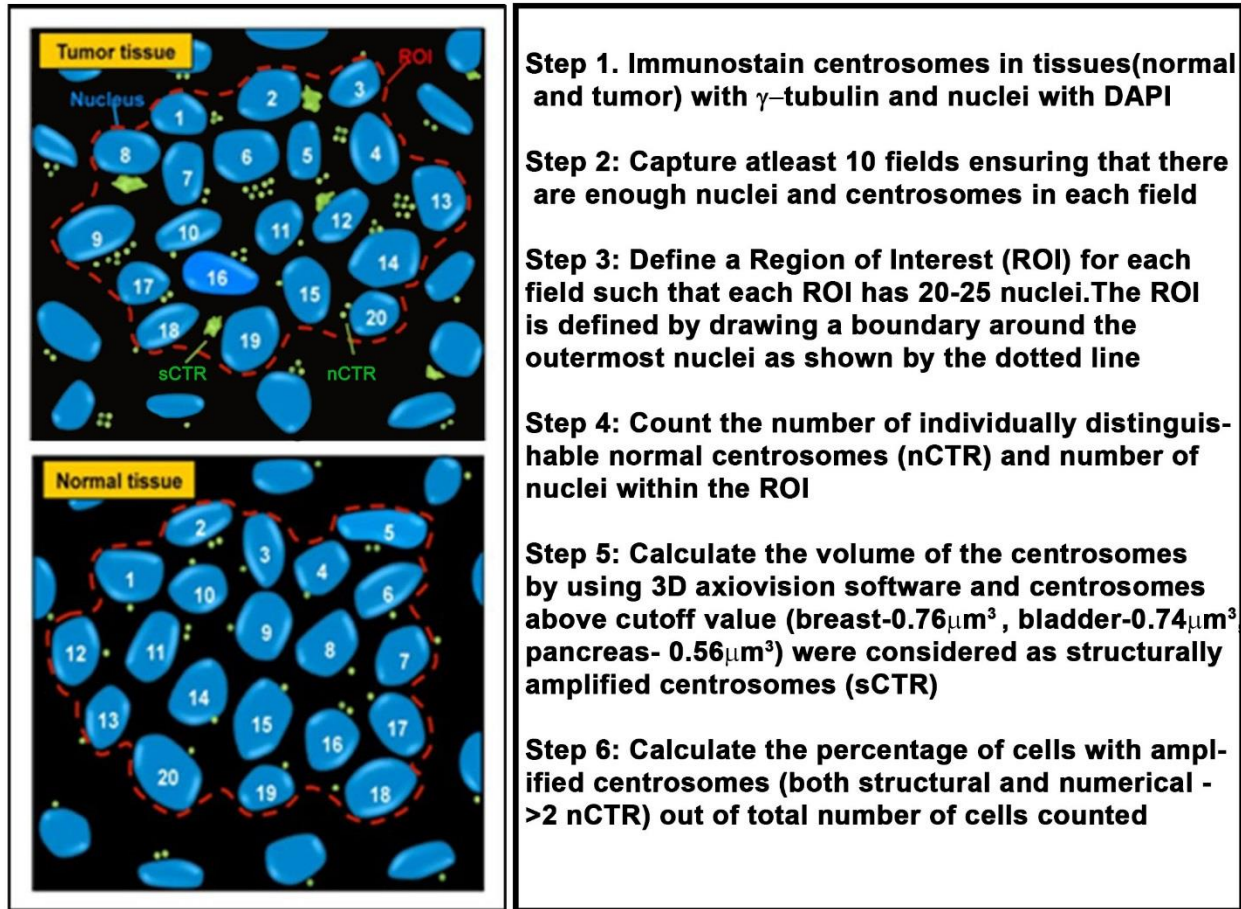

**Supplementary Figure 1:** Schematic showing the steps followed for quantitation of CA in the cancer tissues, normal tissues and their corresponding cultured cell lines.

**Supplementary Figure- 2 (Aneja et al)**  
**MDA-MB 468**

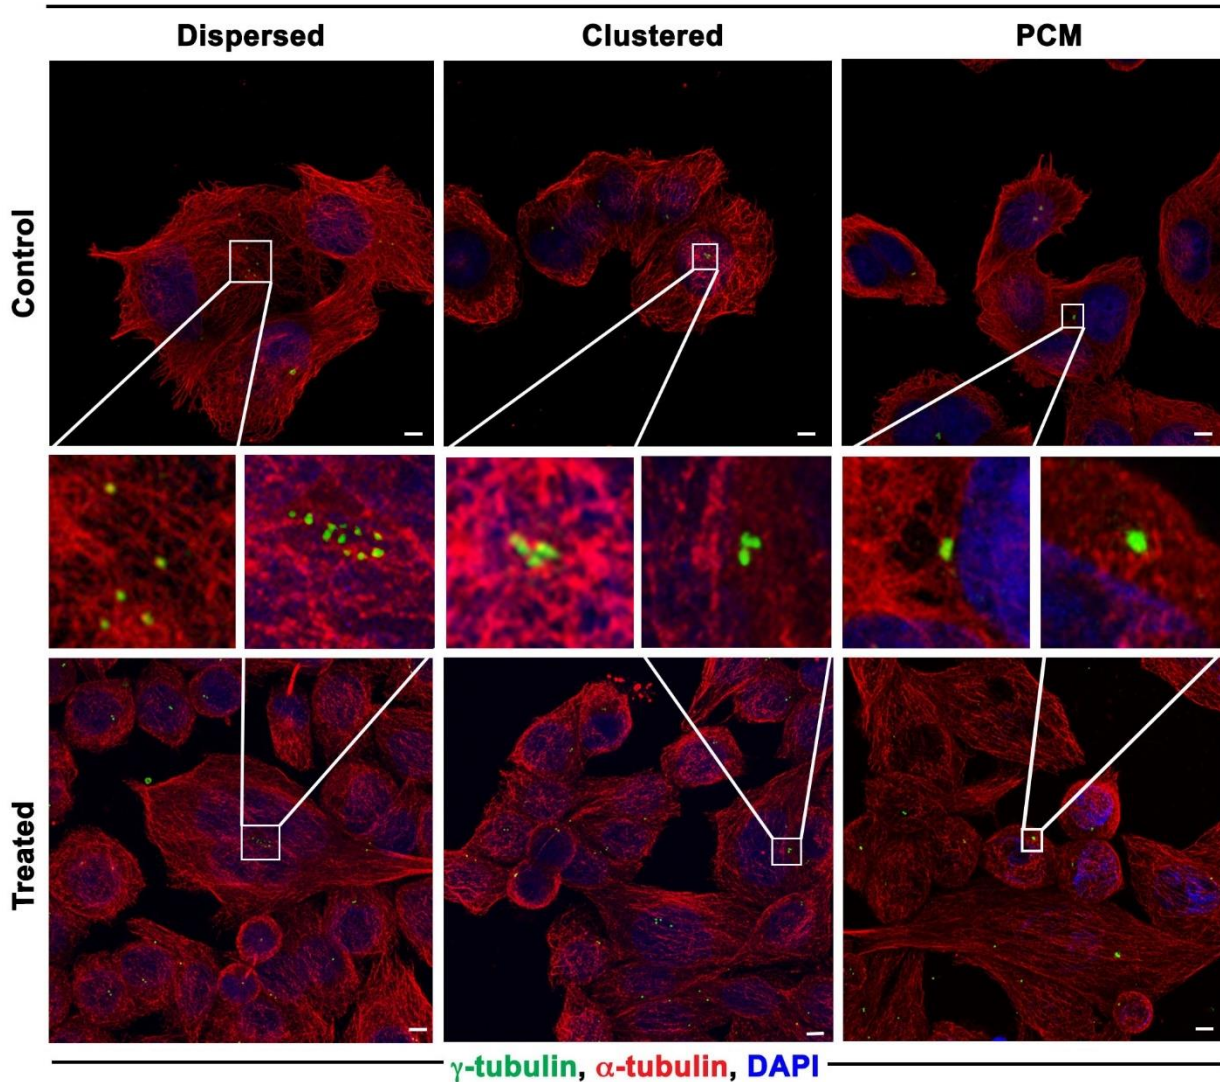

**Supplementary Figure 2:** Different configurations of Centrosome aberrations observed in MDA-MB-468 after hypoxia induction by treating them with  $\text{CoCl}_2$ . Representative immune-micrographs of cells with centrosome aberrations (“dispersed” refers to cells with centrosomes widely dispersed in interphase; “clustered” refers to cells with supernumerary centrosomes that are individually distinguishable or clustered tightly together in interphase; and “PCM” refers to centrosomes that are abnormally large due to PCM accumulation).

**Supplementary Figure- 3A (Aneja et al)**  
**MDA-MB 231**

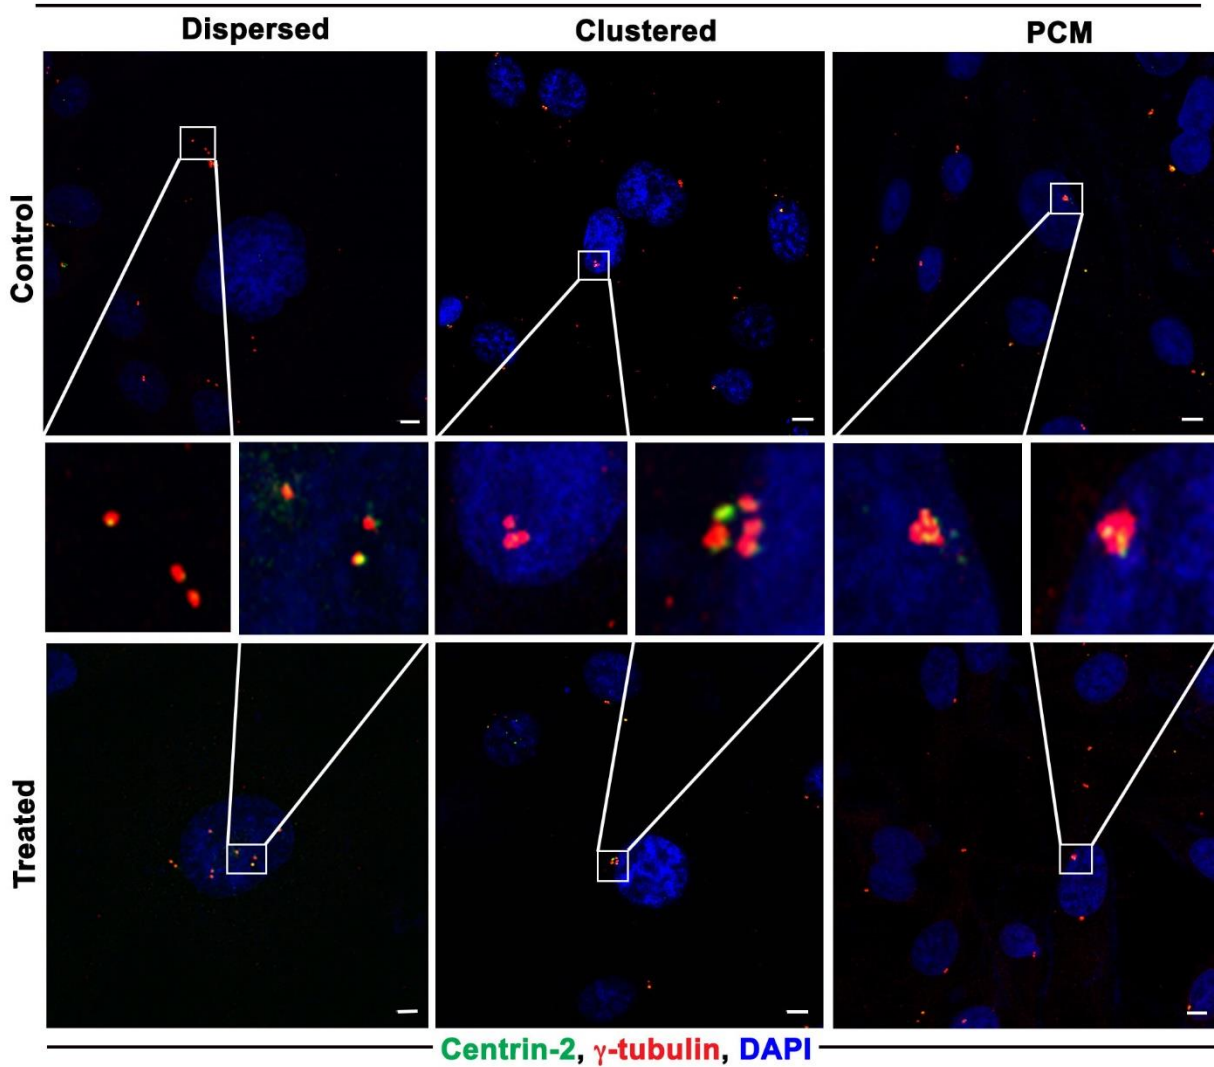

**Supplementary Figure 3A:** Different configurations of Centrosome aberrations observed in MDA-MB-231 immunostained for centrin-2 (green) and  $\gamma$ -tubulin (red) after treatment with  $\text{CoCl}_2$ . Representative immune-micrographs of cells with centrosome aberrations (“dispersed’ refers to cells with centrosomes widely dispersed in interphase; “clustered” refers to cells with supernumerary centrosomes that are individually distinguishable or clustered tightly together in

interphase; and “PCM” refers to centrosomes that are abnormally large due to PCM accumulation). 200 cells were counted in each condition.

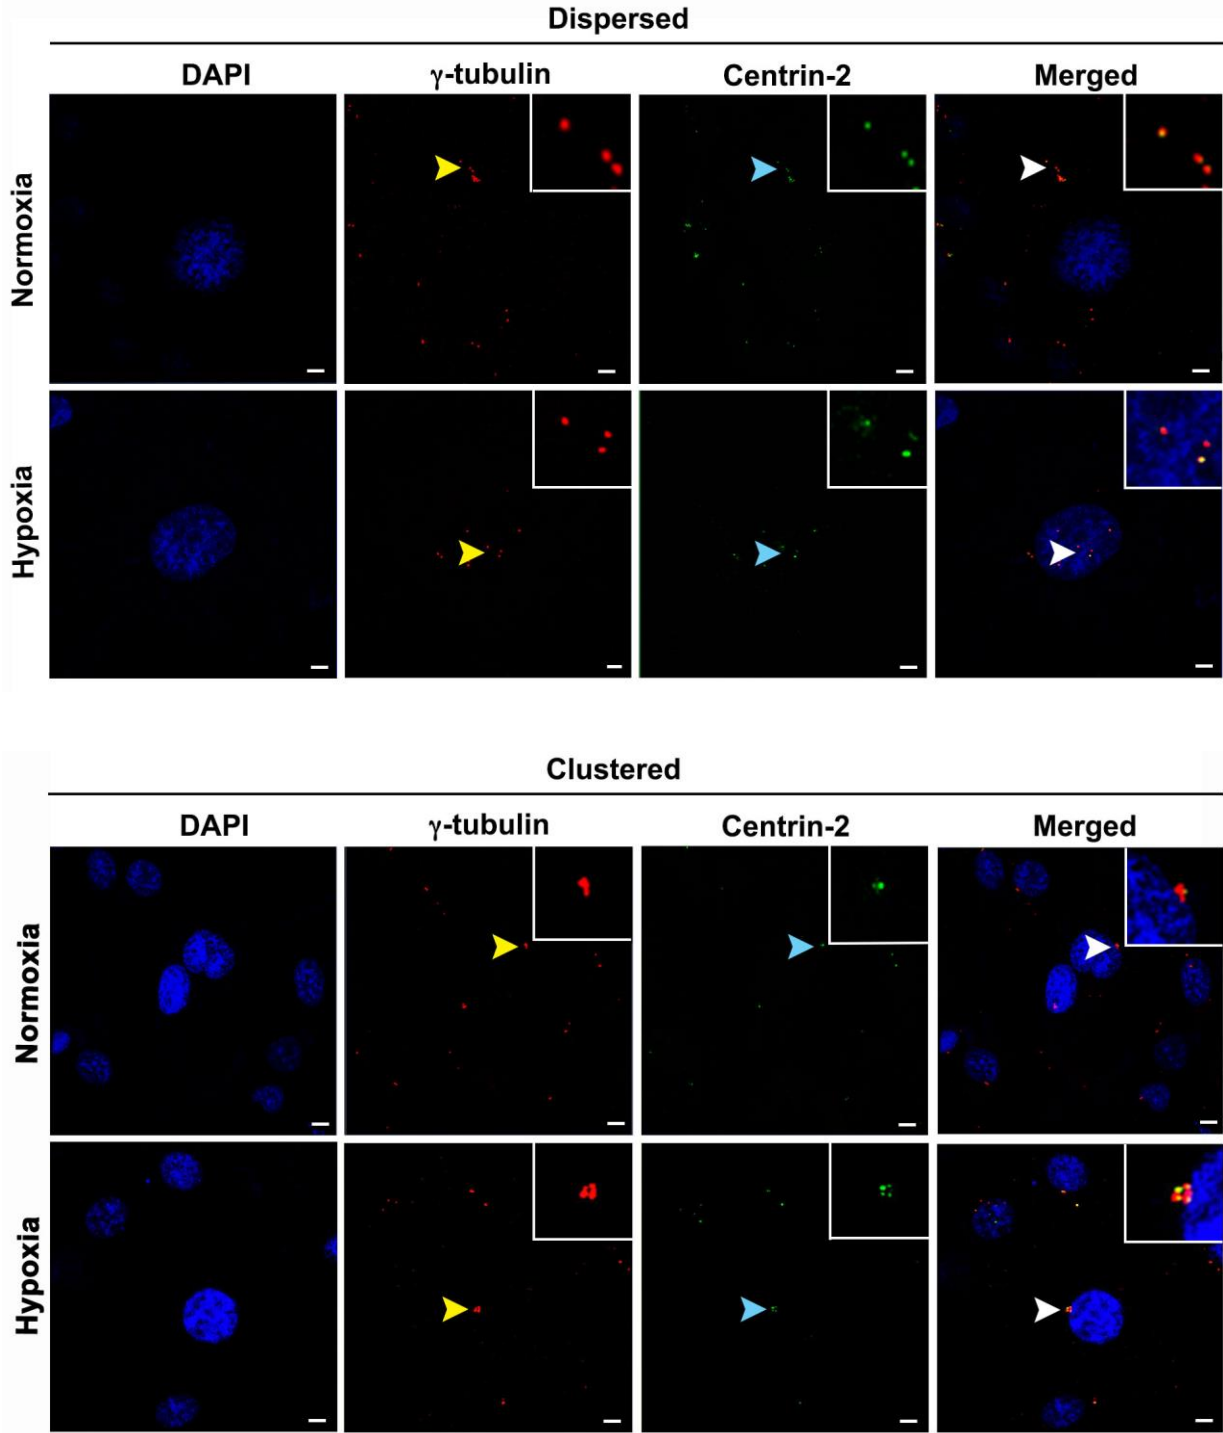

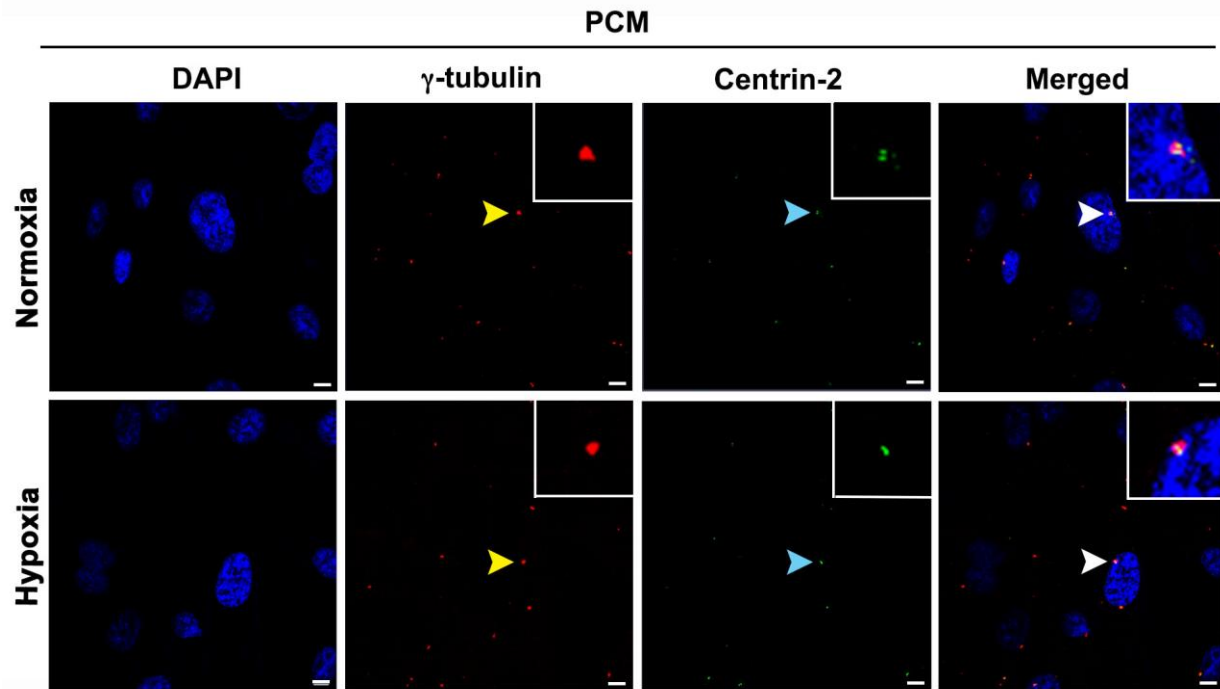

**Figure 3B, C & D:** Representative immunographs (channel-separated) of MDA-MB-231 cells immunostained for centrin-2 (green) and  $\gamma$ -tubulin (red) after treatment with  $\text{CoCl}_2$ . Where panel 1 in all three images is DAPI (Nuclei) panel 2 is  $\gamma$ -tubulin (red) and panel 3 is centrin-2 (green). **B:** Represents the split confocal images of dispersed centrosome aberrations. **C:** Represents the split confocal images of the clustered CA. **D:** Represents the split confocal images of structural aberration with PCM accumulation.

**Supplementary Figure- 4 (Aneja et al)**

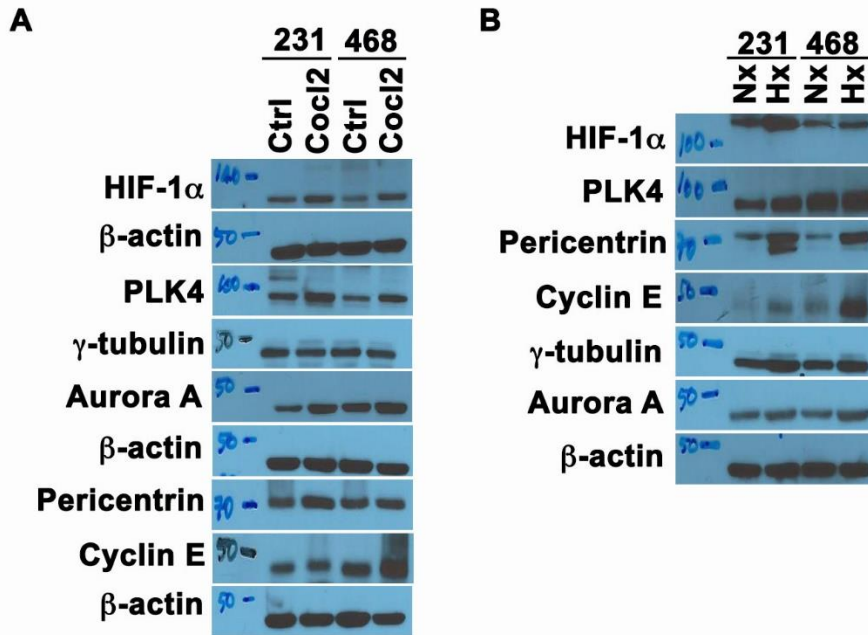

**Supplementary Figure 4:** Protein immunoblots. **A** : Immunoblots showing the levels of hypoxia and centrosomal markers in MDA-MB-231 and MDA-MB-468 cells treated with 100μM of CoCl<sub>2</sub> for 24 h. **B**. Immunoblots showing the levels of hypoxia and centrosomal markers in MDA-MB-231 and MDA-MB-468 cells exposed to hypoxia for 48 h.



**Supplementary Figure- 5 (Aneja et al)**

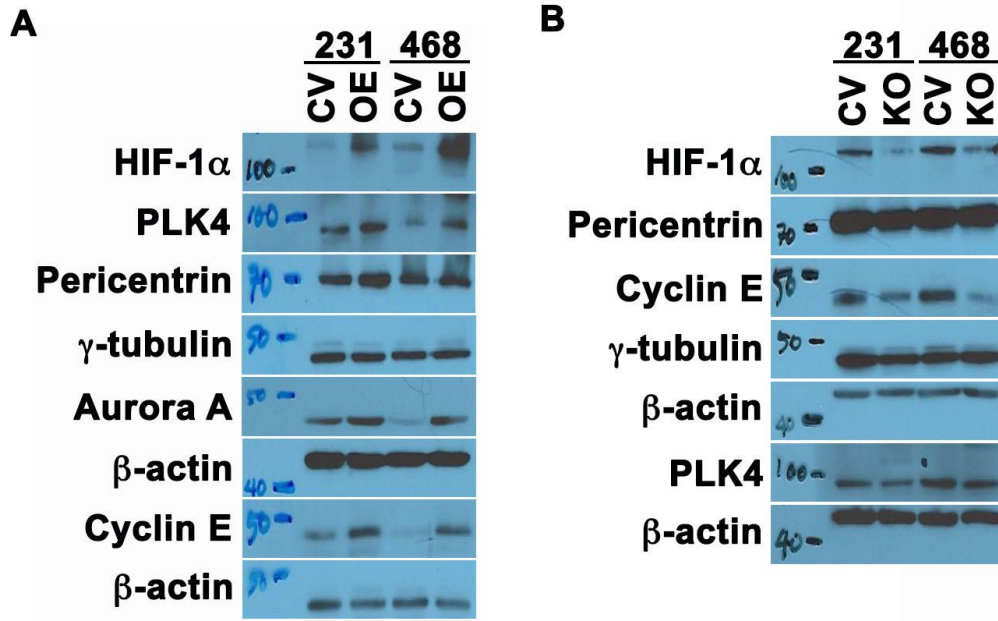

**Supplementary Figure 5:** Protein immunoblots. **A** Immunoblots of HIF-1α and centrosomal proteins in MDA-MB-231 and MDA-MB-468 transfected with empty vector or degradation-resistant HIF-1α. **B.** Immunoblots of HIF-1α and centrosomal proteins in MDA-MB-231 and MDA-MB-468 transfected with Cas9-sgRNA (HIF-1α) construct or control vector (pSpCas9-2A-GFP).

Supplementary Figure- 6 (Aneja et al)

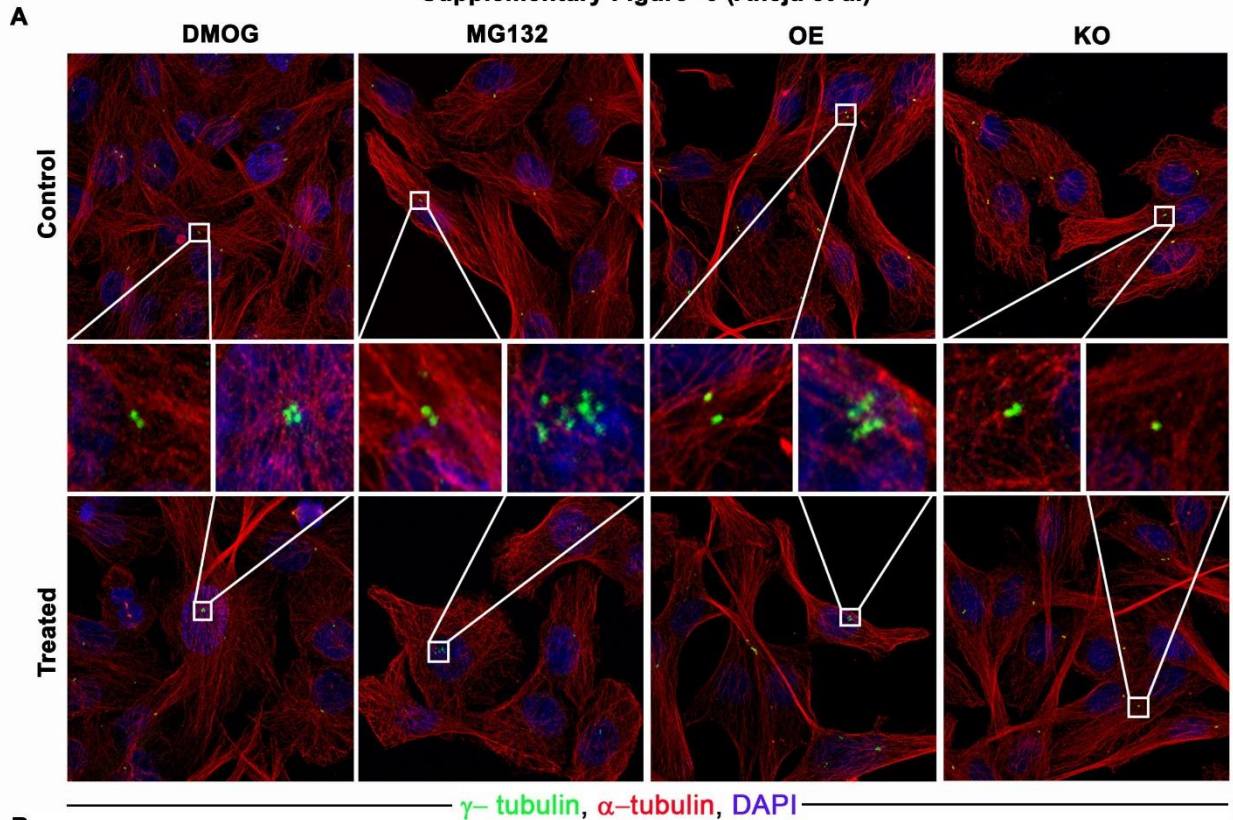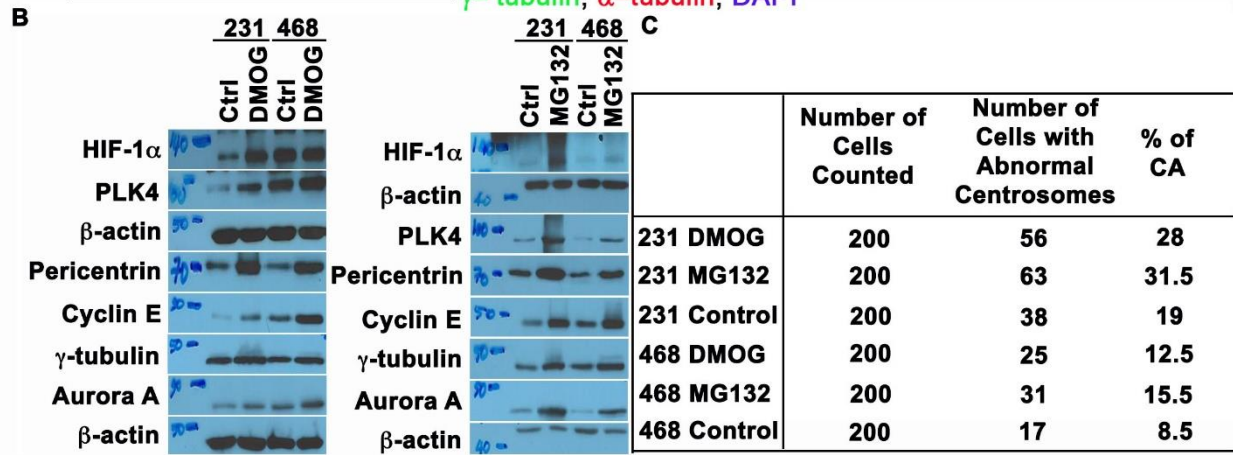

**Supplementary Figure 6:** A. Representative confocal micrographs of centrosome aberrations in MDA-MB-231 cells treated with DMOG and MG132. Representative confocal micrographs of centrosome aberrations in MDA-MB-231 transfected with empty vector or degradation-resistant HIF-1 $\alpha$  and with HIF-1 $\alpha$  gene KO. B. Immunoblots showing the levels of hypoxia and centrosomal markers in cells treated with 1mM DMOG for 24 h. Immunoblots showing the levels of hypoxia and centrosomal markers in cells treated with 5 $\mu$ M of MG132 for 5 h. C. Quantitation of centrosome aberrations per microscopic examination for DMOG and MG132 treated and untreated MDA-MB-231 and MDA-MB-468 cells.

### **Enrichment of centrosomal gene expression in tumors with a hypoxia-high gene expression signature**

We validated our in vitro findings of a correlation between CA and hypoxia in silico by probing the publicly-available Kao<sup>1</sup> and Jonsdottir<sup>2</sup> microarray datasets using Gene Set Enrichment Analysis (GSEA).<sup>3</sup> Essentially, our goal was to determine whether breast tumors that are enriched in hypoxia-associated transcripts also show a correlational enrichment in centrosomal transcripts. Publicly available pre-processed gene expression profiles of primary breast tumors (n=327 for the Kao dataset, GSE20685; n=94 for the Jonsdottir dataset, GSE46563) were used for GSEA. Within each dataset, patients were stratified into two groups by a hypoxia score, the reduced hypoxia metagene previously shown to have prognostic ability in multiple cancers.<sup>4,5</sup> As previously defined, hypoxia scores were calculated as the median expression of 26 genes that are upregulated in response to hypoxia. Scores  $\leq$  median were categorized as “hypoxia low” and scores  $>$  median were categorized as “hypoxia high.” For the Kao dataset, Affymetrix probes with the “x\_at” extension were removed unless no other probe was available (e.g., as with *ALDOA*). For the Jonsdottir dataset, Illumina probes with the “A” designator were preferentially used. When multiple probes were present, their median expression was used in score calculation. GSEA was

performed with 1000 permutations, and false discovery rate  $q$ -values $<0.05$  were considered statistically significant.

Using the Kao dataset, we collapsed features into gene symbols, resulting in 20,606 genes being available for GSEA using curated gene sets from Molecular Signatures Database<sup>6</sup> v5.0, including those from the Gene Ontology (GO) Consortium (for analysis of cellular components and biological processes) and Reactome<sup>7</sup> v53 (for pathway analysis), along with gene sets that we defined based on empirical evidence from the literature. We validated that the hypoxia-high group was differentially enriched in hypoxia-associated genes by performing GSEA with the full hypoxia metagene as shown in Supplementary Fig. 7 (also see Supplementary Table 1 for study details and Supplementary Table 2 for the ranked gene list;  $n=44$  after filtering). We then performed GSEA to identify gene ontologies associated with the hypoxia-high group, which we found was significantly enriched in microtubule-organizing center and centrosome components, which were among the top-20 enriched cellular components (see Supplementary Table 1 for these and all other enriched gene ontologies). The hypoxia-high group was also enriched in cell cycle-related processes, which constituted the top-ranked gene ontology among biological processes. Cellular pathway analysis using Reactome terms identified mitosis as the third-most enriched pathway, with various other cell cycle-related pathways also significantly enriched. Cellular pathway analysis revealed an enrichment in genes associated with the recruitment of centrosome proteins and complexes. Intriguingly, the hypoxia-high group was also enriched in genes involved in the cellular pathway associated with loss of ninein-like protein (NLP), a  $\gamma$ -tubulin-binding protein, from mitotic centrosomes. It is known that PLK1 and NEK2 phosphorylate NLP at the onset of mitosis, resulting displacement of NLP from the centrosome, which is associated with centrosome maturation (involving the recruitment of  $\gamma$ -tubulin ring complexes and other pericentriolar material

components) and a concomitant increase in microtubule-nucleating capacity. PLK1 or NEK2 overexpression results in premature NLP dissociation from centrosomes and also induces CA.<sup>8</sup>

Although hypoxia-high breast tumors were clearly found to be enriched in centrosomal components and pathways, we wanted to more specifically test the hypothesis that they are enriched in gene ontologies related to CA per se. No high-throughput screen of CA-associated genes has been performed to inform construction of a CA gene set; nevertheless, the literature reports that CA is associated with hormone receptor-negative and node-positive breast cancer.<sup>9</sup> Thus, we analyzed enrichment of centrosome-associated genes (namely, experimentally identified human centrosomal proteins in the MiCroKiTS<sup>10</sup> database; n=540 genes) in hormone receptor-positive node-negative patients, rationalizing that this gene set has a high likelihood of representing CA. We found that 77 of these genes were enriched in hormone receptor-negative node-positive breast carcinomas. Next, we performed GSEA using these 77 genes as a gene set, which we found was significantly enriched in the hypoxia-high group, as shown in Supplementary Fig. 7B (also see Supplementary Table 3 for the ranked gene list). Many genes implicated in CA (such as *AURKA*, *CCNA2*, *CCNE2*, *CEP152*, *NEK2*, *PLK4*, and *STIL*) or amplified centrosome clustering (such as *KIFC1*, the top-ranked hit, along with *BIRC5* and *TACC3*) from the literature are among the enriched genes from this set. Because CA drives chromosomal instability (CIN), we wondered whether hypoxia-high cases were also enriched in CIN-associated genes. To this end, we performed GSEA with genes from the CIN25 signature, net overexpression of which has prognostic significance in various types of cancer.<sup>11</sup> We found this set was highly enriched in the hypoxia-high group (Supplementary Table 1). Collectively, these results suggest that hypoxic breast tumors are enriched in CA- and CIN-associated genes.

## **Enrichment of centrosomal gene expression in tumors with a hypoxia-high gene expression signature regardless of mitotic activity**

Many CA-associated proteins do not exclusively localize to the centrosome; some also localize to the mitotic spindle. Thus, it could be argued that, rather than having a greater extent of CA, the hypoxia-high group merely has more mitotic cells than the hypoxia-low group. To test this hypothesis, we analyzed the Jonsdottir dataset, which contains gene expression profiles and mitotic activity indices for 94 breast tumor specimens from lymph node-negative patients. To begin, we validated that the hypoxia-high group was enriched in hypoxia-associated genes. We performed GSEA with the full hypoxia metagene and found significant enrichment (Supplementary Table 1), which also underscores the robustness of this 26-gene hypoxia signature across platforms and breast cancer datasets. We then performed GSEA using the 77 potentially CA-associated genes (that is, those that were enriched in the hormone receptor-negative node-positive breast carcinomas from the Kao dataset) and found significant enrichment in the Jonsdottir dataset as well (Supplementary Table 4). This is especially interesting because the Jonsdottir patients are also all node-negative, indicating this gene set captures a phenotype that is not wholly dependent on nodal status. There was substantial overlap in the potentially CA-associated genes enriched in the Jonsdottir and Kao hypoxia-high groups. Next, we did find that the hypoxia-high group was associated with a high mitotic activity index (MAI; >10 mitotic figures per 10 fields of vision) based on the Mann-Whitney test ( $p=0.01$ ). Nonetheless, when we performed GSEA on the MAI-low group ( $n=60$ ) using hypoxia scores as the phenotype, we still found that the hypoxia-high group was enriched in potentially CA-associated genes (Supplementary Table 5). Thus, even among tumors with relatively low mitotic activity, hypoxia-high tumors show enrichment in potentially CA-associated genes, minimizing the probability that we are merely capturing proliferation-associated genes with our gene set. Combined with our in

vitro data, these in silico data substantiate the hypothesis that hypoxia is associated with CA in patient breast tumors.

Finally, we were interested to determine whether hypoxia-associated CA, as determined by gene expression levels, predicts worse outcomes and, if so, whether its predictive ability depends on mitotic activity. To this end, we created a score based on the top ten CA-associated genes enriched in the hypoxia-high samples of the Jonsdottir dataset (from Supplementary Table 4). Specifically, we defined the hypoxia-associated CA score as the median expression of those top 10 genes. Kaplan-Meier analysis and Cox regression were performed using SPSS Statistics version 21 (IBM). For multivariate Cox regression analysis, all potential predictors were entered into the full model and then eliminated stepwise based on an  $\alpha=0.10$  elimination criterion. Optimal cut points based on distant-metastasis-free survival (DMFS) were found using X-tile<sup>12</sup> per the highest  $X^2$  value following dichotomization. We found that stratifying patients based on a cutpoint of 317 resulted in the CA score having the best predictive ability using the 94 node-negative breast cancer patients of the Jonsdottir dataset ( $p=0.020$ ; Supplementary Fig. 6C). Univariate Cox regression revealed that a high hypoxia-associated CA score (i.e.,  $>317$ ) was associated with worse DMFS (HR=2.87;  $p=0.026$ ), which was upheld in multivariate regression adjusting for all available potentially confounding covariates (including tumor size, Nottingham grade, estrogen and human epidermal growth factor receptor 2 statuses, and mitotic activity index). In fact, only this score remained in the final model. When hypoxia score was added to the Cox regression analysis, the effect of CA score on DMFS was more pronounced (HR=3.39,  $p=0.011$ ). Only the CA score and hypoxia score remained in the final model, though the hypoxia score was no longer significant (HR=2.22,  $p=0.066$ ). When the analysis was repeated without the CA score in the full model, however, the hypoxia score was a significant predictor of DMFS (HR=2.45,  $p=0.047$ ), as was mitotic activity (HR=2.88,  $p=0.017$ ), with no other variables in the final model. These results raise the tantalizing possibility that the ability of the hypoxia score to predict DMFS results from

its association with CA. Even more intriguing is the idea that hypoxia might upregulate CA to drive metastatic dissemination, an exciting avenue of future research.

Supplementary Figure- 7 (Aneja et al)

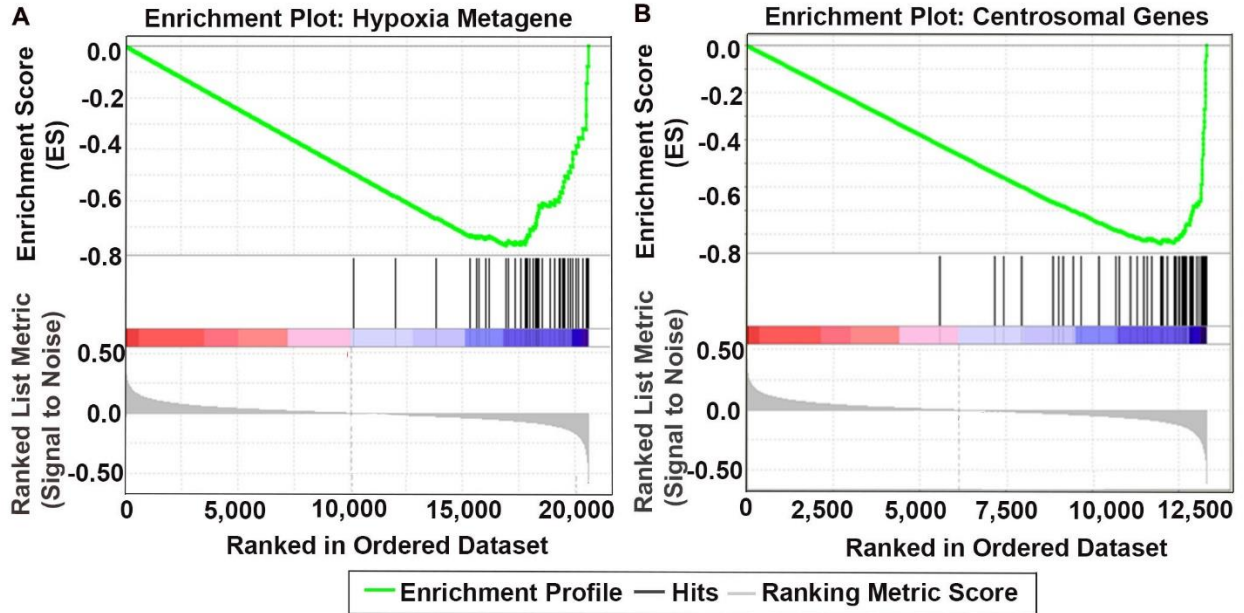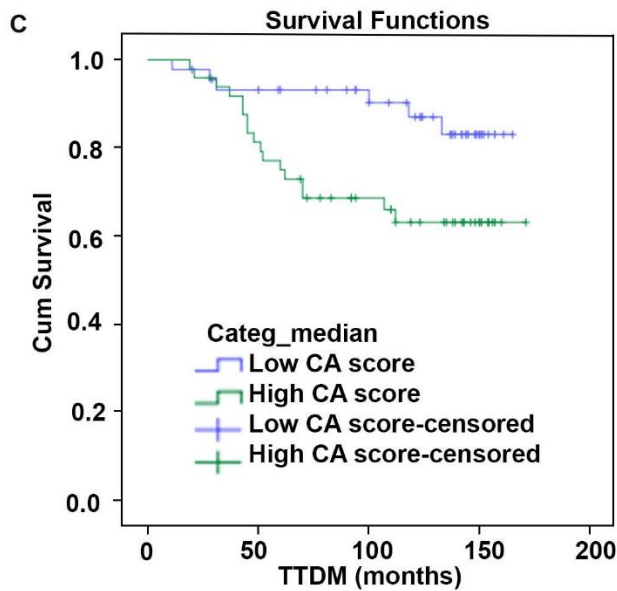

D*i*

| CA Score | Total Cases | Distant Metastases | Censored |       |
|----------|-------------|--------------------|----------|-------|
|          |             |                    | N        | %     |
| Low      | 45          | 6                  | 39       | 86.7% |
| High     | 49          | 17                 | 32       | 65.3% |
| Overall  | 94          | 23                 | 71       | 75.5% |

D*ii*

Mean For DMF S Time

| CA Score | Estimate | Std. Error | Mean <sup>3</sup> 95% Confidence Interval |         |
|----------|----------|------------|-------------------------------------------|---------|
|          |          |            | Lower                                     | Upper   |
|          |          |            | Low                                       | 150.667 |
| High     | 128.674  | 8.409      | 112.192                                   | 145.156 |
| Overall  | 141.257  | 5.513      | 130.451                                   | 152.063 |



**Supplementary Figure 7: Gene-set enrichment and Kaplan-Meier analyses based on hypoxia- and centrosome aberrations-associated genes.** **A.** Enrichment plots of hypoxia metagene components available in the Kao dataset and **B.** genes potentially associated with centrosome aberrations (CA), with red indicating correlation with the hypoxia-low group and blue the hypoxia-high group. **C.** Plots of Kaplan-Meier product limit estimates of distant metastasis-free survival of patients in the Jonsdottir dataset stratified by hypoxia-associated CA score (low vs. high),  $p=0.020$  by the log-rank test. TTDM=time to distant metastasis. **Di.** Number of distant metastases and censored cases by centrosome amplification score. **Dii.** Mean distant metastasis-free survival time by centrosome amplification score.

### Supplementary Figure- 8 (Aneja et al)

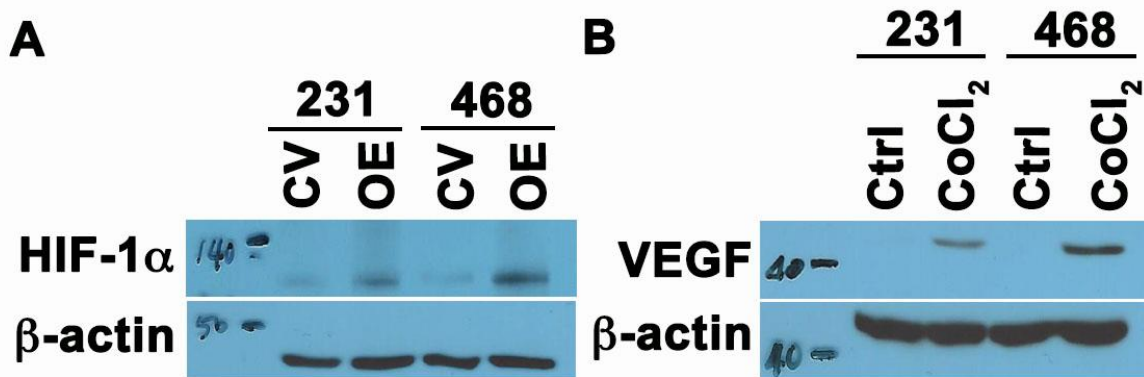

**Supplementary Figure 8:** Representative immunoblots **A.** Immunoblots of HIF-1α in MDA-MB-231 and MDA-MB-468 transfected with empty vector or degradation-resistant HIF-1α. **B.** Immunoblots of VEGF in MDA-MB-231 and MDA-MB-468 cells treated with 100μM of CoCl<sub>2</sub> for 24 hrs.

## Supplementary Figure- 9 (Aneja et al)

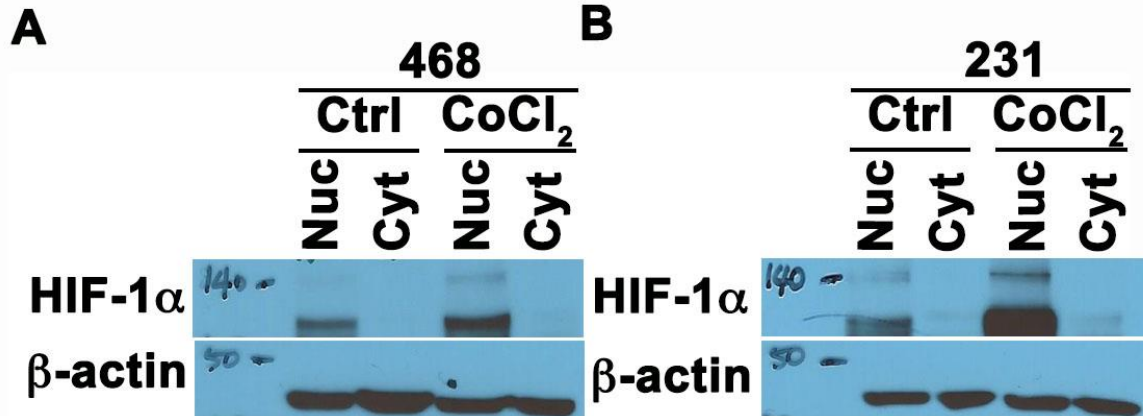

**Supplementary Figure 9:** Representative immunoblots showing the levels of HIF-1α in nuclear and cytoplasmic lysates of MDA-MB-231 and MDA-MB-468 cells treated with 100μM of CoCl<sub>2</sub> for 24 hrs.

| Gene Set             | Size after Filtering | ES | NES | NOM p-value | FDR q-value | FWER p-value | Rank at Max |
|----------------------|----------------------|----|-----|-------------|-------------|--------------|-------------|
| Kao - Entire Dataset |                      |    |     |             |             |              |             |

|                                                                                          |     |       |       |             |             |             |      |
|------------------------------------------------------------------------------------------|-----|-------|-------|-------------|-------------|-------------|------|
| Hypoxia<br>Metagene (Buffa<br>et al., 2010)                                              | 44  | -0.77 | -2.04 | <0.001      | <0.001      | <0.001      | 3686 |
| Microtubule<br>Organizing Center<br>(GO:0005815)                                         | 57  | -0.54 | -2.06 | <0.001      | 4.5E-<br>03 | 0.03        | 1531 |
| Centrosome<br>(GO:0005813)                                                               | 49  | -0.54 | -2.01 | <0.001      | 0.01        | 0.05        | 1531 |
| Cell cycle<br>(GO:0007049)                                                               | 285 | -0.61 | -2.33 | <0.001      | 3.1E-<br>03 | 0.02        | 2632 |
| Cell Cycle - Mitotic<br>(Pathway:69278)                                                  | 271 | -0.67 | -2.29 | <0.001      | 4.2E-<br>03 | 0.01        | 2316 |
| Recruitment of<br>Mitotic<br>Centrosome<br>Proteins and<br>Complexes<br>(Pathway:380270) | 54  | -0.46 | -1.89 | 0.02        | 0.02        | 0.01        | 2313 |
| Loss of NLP from<br>Mitotic<br>Centrosomes<br>(Pathway:380259)                           | 47  | -0.46 | -1.85 | 0.02        | 0.02        | 0.40        | 2313 |
| Centrosomal<br>Genes<br>Upregulated in<br>ER/PR+ Node-<br>Tumors                         | 77  | -0.82 | -1.88 | <0.001      | <0.001      | <0.001      | 2630 |
| CIN25 Genes<br>(Carter et al.,<br>2006)                                                  | 23  | -0.89 | -1.69 | <0.001      | <0.001      | <0.001      | 1297 |
| <b>Jonsdottir -<br/>Entire Dataset</b>                                                   |     |       |       |             |             |             |      |
| Hypoxia<br>Metagene (Buffa<br>et al., 2010)                                              | 47  | -0.81 | -1.55 | 0.01        | 0.01        | 0.003       | 5057 |
| Centrosomal<br>Genes<br>Upregulated in<br>ER/PR+ Node-<br>Tumors                         | 77  | -0.81 | -1.56 | 4.0E-<br>03 | 4.0E-<br>03 | 2.0E-<br>03 | 4008 |
| <b>Jonsdottir - MAI-<br/>Low Only</b>                                                    |     |       |       |             |             |             |      |
| Hypoxia<br>Metagene (Buffa<br>et al., 2010)                                              | 47  | -0.75 | -1.49 | 0.04        | 0.04        | 0.02        | 5163 |
| Centrosomal<br>Genes<br>Upregulated in<br>ER/PR+ Node-<br>Tumors                         | 77  | -0.85 | -1.72 | <0.001      | <0.001      | <0.001      | 1813 |

---

**Supplementary Table 1.** Gene Set Enrichment Analyses for specified Gene Ontologies, Reactome pathways, literature-based gene sets, and self-defined gene sets. GO and Reactome IDs (for curated gene sets) and publication details (for literature-based gene sets) are given in parentheses. ES=Enrichment Score; NES=Normalized Enrichment Score; NOM=nominal; FDR=False Discovery Rate; FWER=Family-Wise Error Rate

| GENE SYMBOL | RANK IN GENE LIST | RANK METRIC SCORE | RUNNING ES | CORE ENRICHMENT |
|-------------|-------------------|-------------------|------------|-----------------|
| ALDOA       | 10185             | -0.001037822      | -0.4951352 | No              |
| ANKRD37     | 12004             | -0.013171702      | -0.5810628 | No              |
| LRRC42      | 13846             | -0.026962586      | -0.6655041 | No              |
|             |                   |                   | -          |                 |
| MCTS1       | 15337             | -0.04007807       | 0.7303977  | No              |
|             |                   |                   | 6          |                 |
| MIF         | 15612             | -0.042822175      | -0.7356349 | No              |
| CHCHD2      | 15748             | -0.044233657      | -0.7338455 | No              |
| LDHA        | 16016             | -0.047092326      | -0.7379356 | No              |
|             |                   |                   | -          |                 |
| GAPDH       | 16182             | -0.049089462      | 0.7366879  | No              |
|             |                   |                   | 6          |                 |
|             |                   |                   | -          |                 |
| GPI         | 16921             | -0.058381788      | 0.7615520  | Yes             |
|             |                   |                   | 4          |                 |
|             |                   |                   | -          |                 |
| SEC61G      | 17016             | -0.059670471      | 0.7548528  | Yes             |
|             |                   |                   | 3          |                 |
|             |                   |                   | -          |                 |
| UTP11L      | 17344             | -0.064875908      | 0.7585019  | Yes             |
|             |                   |                   | 5          |                 |
|             |                   |                   | -          |                 |
| HK2         | 17604             | -0.069081984      | 0.7580495  | Yes             |
|             |                   |                   | 5          |                 |
| TUBB6       | 17812             | -0.072616458      | -0.7544006 | Yes             |
| PSMA7       | 17838             | -0.073151112      | -0.7417994 | Yes             |
| SLC25A32    | 17903             | -0.074541941      | -0.7308322 | Yes             |
|             |                   |                   | -          |                 |
| PGK1        | 18012             | -0.076205611      | 0.7216906  | Yes             |
|             |                   |                   | 5          |                 |
|             |                   |                   | -          |                 |
| BNIP3       | 18017             | -0.076291725      | 0.7074749  | Yes             |
|             |                   |                   | 5          |                 |
|             |                   |                   | -          |                 |
| P4HA1       | 18145             | -0.07900098       | 0.6987294  | Yes             |
|             |                   |                   | 6          |                 |
|             |                   |                   | -          |                 |
| MAD2L2      | 18230             | -0.080925092      | 0.6875292  | Yes             |
|             |                   |                   | 7          |                 |
|             |                   |                   | -          |                 |
| CORO1C      | 18285             | -0.082037203      | 0.6746599  | Yes             |
|             |                   |                   | 7          |                 |
| ENO1        | 18319             | -0.082770482      | -0.6606309 | Yes             |

|         |       |              |                     |     |
|---------|-------|--------------|---------------------|-----|
| TPI1    | 18340 | -0.083269544 | -<br>0.6458753<br>3 | Yes |
| SLC16A1 | 18401 | -0.084655896 | -<br>0.6328032<br>6 | Yes |
| YKT6    | 18405 | -0.084711224 | -0.6169486          | Yes |
| DDIT4   | 18565 | -0.088841394 | -0.6079007          | Yes |
| MRPL15  | 18878 | -0.098103359 | -<br>0.6045441<br>6 | Yes |
| MRPL13  | 19107 | -0.106322989 | -<br>0.5955499<br>4 | Yes |
| AK3L1   | 19315 | -0.114598989 | -0.5839712          | Yes |
| NDRG1   | 19351 | -0.11648801  | -<br>0.5636707<br>5 | Yes |
| NP      | 19458 | -0.121711895 | -0.5458365          | Yes |
| SLC2A1  | 19484 | -0.12285845  | -<br>0.5238464<br>5 | Yes |
| MRPS17  | 19534 | -0.126033917 | -<br>0.5024237<br>6 | Yes |
| ACOT7   | 19727 | -0.138207912 | -<br>0.4856561<br>7 | Yes |
| PFKP    | 19803 | -0.144859448 | -<br>0.4619421<br>4 | Yes |
| HIG2    | 19898 | -0.152798504 | -0.4376526          | Yes |
| PSRC1   | 19910 | -0.154252052 | -0.4090519          | Yes |
| ADM     | 20066 | -0.17373921  | -<br>0.3837736<br>2 | Yes |
| CA9     | 20175 | -0.192664087 | -<br>0.3526349<br>7 | Yes |
| CTSL2   | 20338 | -0.228577107 | -<br>0.3173391<br>8 | Yes |
| SHCBP1  | 20490 | -0.299957722 | -0.2680258          | Yes |
| CDKN3   | 20524 | -0.333389521 | -<br>0.2066589<br>3 | Yes |
| KIF20A  | 20528 | -0.337646633 | -<br>0.1430289<br>9 | Yes |

|       |       |              |                |     |
|-------|-------|--------------|----------------|-----|
| KIF4A | 20545 | -0.356419325 | -<br>0.0764854 | Yes |
| ANLN  | 20585 | -0.420125276 | 3<br>9.73E-04  | Yes |

**Supplementary Table 2.** Rank-ordered list of filtered hypoxia metagene components with associated rank metric scores, enrichment scores (ES), and whether each gene is part of the core enriched genes (i.e., the leading-edge subset) in the hypoxia-high group of the Kao dataset.

**Supplementary Table 3.**

| GENE SYMBOL | RANK IN GENE LIST | RANK METRIC SCORE | RUNNING ES | CORE ENRICHMENT |
|-------------|-------------------|-------------------|------------|-----------------|
| TRIM22      | 9257              | 0.005535          | -0.45051   | No              |
| PRKAA1      | 10390             | -0.0025           | -0.50547   | No              |
| MAP1B       | 11819             | -0.01194          | -0.57415   | No              |
| GIMAP5      | 12039             | -0.01341          | -0.58383   | No              |
| FYN         | 12842             | -0.01913          | -0.62148   | No              |
| ODF2L       | 13067             | -0.02089          | -0.63085   | No              |
| RASSF5      | 14099             | -0.02883          | -0.67894   | No              |
| PRKD3       | 14243             | -0.02992          | -0.6837    | No              |
| MARCKS      | 14472             | -0.03196          | -0.69244   | No              |
| LIMK1       | 14658             | -0.03361          | -0.69897   | No              |
| SYK         | 14810             | -0.0351           | -0.70373   | No              |
| HAP1        | 15154             | -0.03818          | -0.71762   | No              |
| PIM1        | 16282             | -0.05017          | -0.76881   | No              |
| FIGN        | 16589             | -0.05401          | -0.77973   | No              |
| LIMK2       | 16953             | -0.05886          | -0.79306   | No              |
| BRSK1       | 17048             | -0.06002          | -0.79321   | No              |
| PRKCQ       | 17094             | -0.06075          | -0.79091   | No              |
| SMURF2      | 17543             | -0.06803          | -0.80771   | No              |
| SOCS1       | 17796             | -0.07242          | -0.81464   | No              |
| NEK6        | 17977             | -0.07552          | -0.81783   | Yes             |
| CRYAB       | 18091             | -0.07784          | -0.81758   | Yes             |
| RUNX3       | 18196             | -0.08005          | -0.81673   | Yes             |

|          |       |          |          |     |
|----------|-------|----------|----------|-----|
| SPHK1    | 18224 | -0.0808  | -0.81208 | Yes |
| SASS6    | 18240 | -0.08116 | -0.80682 | Yes |
| SLC16A1  | 18401 | -0.08466 | -0.80836 | Yes |
| GNAI1    | 18457 | -0.08613 | -0.80467 | Yes |
| TSKS     | 18806 | -0.09576 | -0.81455 | Yes |
| WASF1    | 18833 | -0.0967  | -0.80867 | Yes |
| PLEKHG6  | 19038 | -0.10343 | -0.81097 | Yes |
| PDE7A    | 19279 | -0.11301 | -0.81431 | Yes |
| LCK      | 19344 | -0.11619 | -0.80885 | Yes |
| NDRG1    | 19351 | -0.11649 | -0.80054 | Yes |
| CCNA1    | 19406 | -0.1191  | -0.79437 | Yes |
| CENPJ    | 19444 | -0.12114 | -0.78722 | Yes |
| LMO4     | 19518 | -0.12512 | -0.78154 | Yes |
| PSMD3    | 19615 | -0.13063 | -0.77656 | Yes |
| VAC14    | 19642 | -0.13237 | -0.76805 | Yes |
| CDC25B   | 19705 | -0.13691 | -0.76096 | Yes |
| CHEK2    | 19769 | -0.14153 | -0.75357 | Yes |
| RANBP1   | 19788 | -0.14291 | -0.74389 | Yes |
| GPSM2    | 19923 | -0.15544 | -0.73894 | Yes |
| CKAP2    | 19951 | -0.15892 | -0.72852 | Yes |
| CEP152   | 19990 | -0.16318 | -0.71831 | Yes |
| MCM5     | 19996 | -0.16407 | -0.70644 | Yes |
| GMNN     | 20040 | -0.16928 | -0.69603 | Yes |
| EIF4EBP1 | 20052 | -0.17204 | -0.68385 | Yes |
| TACC3    | 20230 | -0.20252 | -0.67752 | Yes |
| FANCA    | 20250 | -0.20734 | -0.66313 | Yes |
| BRCA2    | 20291 | -0.21723 | -0.64903 | Yes |
| SGOL1    | 20325 | -0.22475 | -0.63403 | Yes |
| STIL     | 20384 | -0.24633 | -0.61866 | Yes |
| ESPL1    | 20406 | -0.25368 | -0.60095 | Yes |
| CHEK1    | 20417 | -0.2561  | -0.58252 | Yes |
| TROAP    | 20421 | -0.25745 | -0.56365 | Yes |
| CCNB1    | 20430 | -0.26098 | -0.54476 | Yes |
| PTTG1    | 20441 | -0.26845 | -0.52542 | Yes |
| CRABP1   | 20449 | -0.27154 | -0.5057  | Yes |
| CCNA2    | 20464 | -0.28031 | -0.48567 | Yes |
| KIF15    | 20467 | -0.28398 | -0.4648  | Yes |
| MAD2L1   | 20468 | -0.28479 | -0.44376 | Yes |
| CENPF    | 20471 | -0.28903 | -0.42251 | Yes |
| AURKA    | 20480 | -0.29411 | -0.40117 | Yes |
| KIF11    | 20487 | -0.29864 | -0.3794  | Yes |
| HMMR     | 20503 | -0.31248 | -0.35705 | Yes |
| CDC25C   | 20510 | -0.32075 | -0.33365 | Yes |



|        |       |          |          |     |
|--------|-------|----------|----------|-----|
| CCNE2  | 20511 | -0.32077 | -0.30996 | Yes |
| NEK2   | 20517 | -0.32682 | -0.28606 | Yes |
| CDKN3  | 20524 | -0.33339 | -0.26172 | Yes |
| KIF14  | 20548 | -0.35903 | -0.23632 | Yes |
| PLK1   | 20550 | -0.35933 | -0.20983 | Yes |
| KIF18A | 20556 | -0.37178 | -0.18261 | Yes |
| ASPM   | 20557 | -0.37248 | -0.1551  | Yes |
| TTK    | 20560 | -0.37723 | -0.12733 | Yes |
| CEP55  | 20561 | -0.37875 | -0.09935 | Yes |
| BIRC5  | 20577 | -0.40346 | -0.07028 | Yes |
| CDC20  | 20586 | -0.42014 | -0.03964 | Yes |
| KIFC1  | 20603 | -0.54844 | 9.75E-05 | Yes |

**Supplementary Table 3.** Rank-ordered list of potential centrosome aberrations-associated genes with associated rank metric scores, enrichment scores (ES), and whether each gene is part of the core enriched genes (i.e., the leading-edge subset) in the hypoxia-high group of the Kao dataset.

| <b>GENE<br/>SYMBOL<br/>LIST</b> | <b>RANK<br/>IN<br/>GENE<br/>LIST</b> | <b>RANK<br/>METRIC<br/>SCORE</b> | <b>RUNNING<br/>ES</b> | <b>CORE<br/>ENRICHME<br/>NT</b> |
|---------------------------------|--------------------------------------|----------------------------------|-----------------------|---------------------------------|
| MAP1B                           | 9927                                 | 0.027879                         | -0.2694731            | No                              |
| GIMAP5                          | 11620                                | 0.018845                         | -0.3146127            | No                              |
| NEK6                            | 14304                                | 0.006694                         | -0.3874912            | No                              |
| TSKS                            | 20675                                | -0.02045                         | -0.5602645            | No                              |
| LCK                             | 21643                                | -0.0252                          | -0.585253             | No                              |
| GNAI1                           | 21692                                | -0.02545                         | -0.5851359            | No                              |
| MARCK<br>S                      | 25609                                | -0.04594                         | -0.6894773            | No                              |
| SYK                             | 25673                                | -0.04634                         | -0.6885981            | No                              |
| WASF1                           | 25818                                | -0.04722                         | -0.689881             | No                              |
| FIGN                            | 26288                                | -0.05058                         | -0.6998489            | No                              |
| SMURF2                          | 26579                                | -0.05269                         | -0.704811             | No                              |

|             |       |          |            |     |
|-------------|-------|----------|------------|-----|
| CCNB1       | 26876 | -0.05483 | -0.7098172 | No  |
| TRIM22      | 28230 | -0.06621 | -0.7430442 | No  |
| SLC16A<br>1 | 28325 | -0.06714 | -0.7418446 | No  |
| BRCA2       | 29320 | -0.07824 | -0.764595  | No  |
| RASSF5      | 29744 | -0.08353 | -0.7714585 | No  |
| PRKAA1      | 30331 | -0.0924  | -0.7822752 | No  |
| HAP1        | 30451 | -0.09399 | -0.780252  | No  |
| ODF2L       | 30904 | -0.10177 | -0.7868843 | No  |
| FYN         | 31621 | -0.1156  | -0.7999487 | No  |
| PRKD3       | 31760 | -0.11896 | -0.7970437 | No  |
| PSMD3       | 32154 | -0.12857 | -0.8005617 | Yes |
| SOCS1       | 32256 | -0.13107 | -0.7959673 | Yes |
| CRABP1      | 32696 | -0.14402 | -0.7998746 | Yes |
| CCNA1       | 32921 | -0.15105 | -0.7975177 | Yes |
| SASS6       | 33107 | -0.15692 | -0.7937663 | Yes |
| BRSK1       | 33320 | -0.16365 | -0.7903748 | Yes |
| CHEK2       | 33524 | -0.17026 | -0.7863668 | Yes |
| RUNX3       | 34028 | -0.19051 | -0.7894138 | Yes |
| LIMK1       | 34450 | -0.20953 | -0.789155  | Yes |
| KIF14       | 34790 | -0.22531 | -0.7857721 | Yes |
| SPHK1       | 34813 | -0.22655 | -0.7736645 | Yes |
| TACC3       | 34830 | -0.22751 | -0.7613397 | Yes |
| PRKCQ       | 34832 | -0.22752 | -0.7486046 | Yes |
| ESPL1       | 34847 | -0.22799 | -0.7361981 | Yes |
| FANCA       | 34935 | -0.23268 | -0.7255213 | Yes |
| CDC25C      | 34988 | -0.23525 | -0.7137451 | Yes |
| VAC14       | 35284 | -0.25222 | -0.7076517 | Yes |
| HMMR        | 35293 | -0.25279 | -0.6936903 | Yes |
| PLEKHG<br>6 | 35543 | -0.27288 | -0.6851819 | Yes |
| CDC25B      | 35587 | -0.27725 | -0.6708041 | Yes |
| PLK1        | 35601 | -0.27839 | -0.655543  | Yes |

|              |       |          |            |     |
|--------------|-------|----------|------------|-----|
| EIF4EBP<br>1 | 35641 | -0.28117 | -0.6408358 | Yes |
| CRYAB        | 35712 | -0.28594 | -0.6267073 | Yes |
| MCM5         | 35760 | -0.29006 | -0.61172   | Yes |
| CKAP2        | 35792 | -0.29443 | -0.5960506 | Yes |
| ASPM         | 35799 | -0.29504 | -0.5796646 | Yes |
| KIF11        | 35823 | -0.29804 | -0.5635741 | Yes |
| CCNE2        | 35873 | -0.30251 | -0.5479429 | Yes |
| GMNN         | 35987 | -0.31268 | -0.5334887 | Yes |
| CENPJ        | 35995 | -0.31324 | -0.5161092 | Yes |
| NEK2         | 36018 | -0.31532 | -0.4990226 | Yes |
| CEP55        | 36028 | -0.31635 | -0.4815231 | Yes |
| CDKN3        | 36053 | -0.31868 | -0.4643022 | Yes |
| PIM1         | 36092 | -0.32313 | -0.4472143 | Yes |
| BIRC5        | 36106 | -0.32495 | -0.4293416 | Yes |
| KIF18A       | 36150 | -0.3296  | -0.4120271 | Yes |
| MAD2L1       | 36155 | -0.33    | -0.3936251 | Yes |
| CENPF        | 36214 | -0.33744 | -0.3762802 | Yes |
| PTTG1        | 36249 | -0.34282 | -0.3579785 | Yes |
| TROAP        | 36260 | -0.3446  | -0.3389218 | Yes |
| KIF15        | 36303 | -0.35197 | -0.3203251 | Yes |
| CEP152       | 36317 | -0.35415 | -0.3008146 | Yes |
| SGOL1        | 36319 | -0.35452 | -0.2809555 | Yes |
| TTK          | 36354 | -0.3624  | -0.2615553 | Yes |
| CDC20        | 36396 | -0.36887 | -0.2419837 | Yes |

|        |       |          |            |     |
|--------|-------|----------|------------|-----|
| CCNA2  | 36406 | -0.37126 | -0.221404  | Yes |
| KIFC1  | 36418 | -0.37251 | -0.2008091 | Yes |
| LIMK2  | 36451 | -0.37996 | -0.1803693 | Yes |
| AURKA  | 36460 | -0.38249 | -0.1591323 | Yes |
| PDE7A  | 36488 | -0.38882 | -0.1380591 | Yes |
| GPSM2  | 36559 | -0.4058  | -0.1172072 | Yes |
| NDRG1  | 36567 | -0.40833 | -0.0944937 | Yes |
| RANBP1 | 36571 | -0.40905 | -0.0716305 | Yes |
| LMO4   | 36595 | -0.41683 | -0.0488768 | Yes |
| STIL   | 36597 | -0.41794 | -0.02546   | Yes |
| CHEK1  | 36684 | -0.50451 | 4.92E-04   | Yes |

---

**Supplementary Table 4.** Rank-ordered list of potential centrosome aberrations-associated genes with associated rank metric scores, enrichment scores (ES), and whether each gene is part of the core enriched genes (i.e., the leading-edge subset) in the hypoxia-high group of the entire Jonsdottir dataset.

| GENE SYMBOL | RANK IN GENE LIST | RANK METRIC SCORE | RUNNING ES | CORE ENRICHMENT |
|-------------|-------------------|-------------------|------------|-----------------|
| CRABP1      | 1247              | 0.196209          | -0.022491  | No              |
| SYK         | 4586              | 0.083097          | -0.108734  | No              |
| MAP1B       | 4941              | 0.077617          | -0.113828  | No              |
| GNAI1       | 6693              | 0.05668           | -0.158298  | No              |
| PRKCQ       | 7260              | 0.051505          | -0.170718  | No              |
| CCNA1       | 11454             | 0.025851          | -0.283677  | No              |
| GIMAP5      | 12204             | 0.022238          | -0.302817  | No              |

|              |       |           |           |     |
|--------------|-------|-----------|-----------|-----|
| LIMK1        | 13681 | 0.015818  | -0.342184 | No  |
| TSKS         | 14283 | 0.013139  | -0.35782  | No  |
| HAP1         | 14837 | 0.010819  | -0.372281 | No  |
| NEK6         | 15431 | 0.008267  | -0.387985 | No  |
| LCK          | 16809 | 0.002983  | -0.425406 | No  |
| RUNX3        | 18761 | -0.004223 | -0.478425 | No  |
| WASF1        | 19448 | -0.006835 | -0.496752 | No  |
| SMURF2       | 20802 | -0.012268 | -0.532971 | No  |
| SOCS1        | 21207 | -0.014023 | -0.543175 | No  |
| CRYAB        | 23902 | -0.025877 | -0.615206 | No  |
| PRKD3        | 24183 | -0.027193 | -0.621249 | No  |
| SLC16A<br>1  | 24424 | -0.028282 | -0.626136 | No  |
| FANCA        | 24474 | -0.028508 | -0.625795 | No  |
| TRIM22       | 26151 | -0.036923 | -0.66938  | No  |
| ODF2L        | 26970 | -0.041393 | -0.689276 | No  |
| LMO4         | 27255 | -0.042918 | -0.694502 | No  |
| VAC14        | 28281 | -0.049818 | -0.719554 | No  |
| FIGN         | 28767 | -0.053333 | -0.729655 | No  |
| MARCK<br>S   | 28812 | -0.053722 | -0.727692 | No  |
| EIF4EBP<br>1 | 30948 | -0.074622 | -0.781589 | No  |
| CHEK2        | 31454 | -0.081308 | -0.790588 | No  |
| RASSF5       | 32122 | -0.091782 | -0.803394 | No  |
| FYN          | 32229 | -0.093444 | -0.800785 | No  |
| PRKAA1       | 33495 | -0.122161 | -0.828128 | No  |
| SPHK1        | 33904 | -0.13265  | -0.831455 | No  |
| BRCA2        | 34464 | -0.152763 | -0.837721 | No  |
| PIM1         | 34891 | -0.169697 | -0.839357 | Yes |
| BRSK1        | 35120 | -0.181113 | -0.834915 | Yes |
| LIMK2        | 35200 | -0.184675 | -0.826196 | Yes |
| PDE7A        | 35419 | -0.198272 | -0.82047  | Yes |
| PLEKHG<br>6  | 35542 | -0.20546  | -0.811701 | Yes |
| PSMD3        | 35718 | -0.219175 | -0.80357  | Yes |
| GMNN         | 35762 | -0.222346 | -0.791649 | Yes |
| NDRG1        | 35901 | -0.235135 | -0.781568 | Yes |
| RANBP1       | 35918 | -0.236222 | -0.768093 | Yes |
| MCM5         | 35984 | -0.242655 | -0.755576 | Yes |
| PLK1         | 36105 | -0.258397 | -0.743634 | Yes |
| SASS6        | 36241 | -0.277588 | -0.730971 | Yes |
| CEP152       | 36386 | -0.312943 | -0.716472 | Yes |
| CENPF        | 36392 | -0.313983 | -0.698116 | Yes |

|        |       |           |           |     |
|--------|-------|-----------|-----------|-----|
| CDC25B | 36411 | -0.319583 | -0.679785 | Yes |
| STIL   | 36430 | -0.324553 | -0.661162 | Yes |
| ASPM   | 36438 | -0.326208 | -0.642141 | Yes |
| AURKA  | 36476 | -0.341741 | -0.623024 | Yes |
| KIF14  | 36482 | -0.342514 | -0.602988 | Yes |
| BIRC5  | 36494 | -0.345894 | -0.582916 | Yes |
| CCNB1  | 36500 | -0.348213 | -0.562544 | Yes |
| KIF18A | 36520 | -0.356315 | -0.542078 | Yes |
| TACC3  | 36528 | -0.35818  | -0.521174 | Yes |
| HMMR   | 36541 | -0.363636 | -0.500085 | Yes |
| CKAP2  | 36568 | -0.374923 | -0.478713 | Yes |
| MAD2L1 | 36570 | -0.37601  | -0.456595 | Yes |
| SGOL1  | 36580 | -0.38294  | -0.434287 | Yes |
| CCNE2  | 36581 | -0.383755 | -0.411685 | Yes |
| KIFC1  | 36583 | -0.383929 | -0.389101 | Yes |
| CCNA2  | 36587 | -0.38714  | -0.366382 | Yes |
| GPSM2  | 36588 | -0.388246 | -0.343516 | Yes |
| CDKN3  | 36616 | -0.40076  | -0.32065  | Yes |
| CDC20  | 36621 | -0.406762 | -0.296802 | Yes |
| ESPL1  | 36626 | -0.410511 | -0.272734 | Yes |
| CHEK1  | 36627 | -0.412625 | -0.248432 | Yes |
| TTK    | 36633 | -0.414843 | -0.224136 | Yes |
| CEP55  | 36647 | -0.434241 | -0.198916 | Yes |
| TROAP  | 36665 | -0.460532 | -0.172257 | Yes |
| KIF11  | 36671 | -0.467194 | -0.144878 | Yes |
| CDC25C | 36678 | -0.47623  | -0.116993 | Yes |
| KIF15  | 36679 | -0.477443 | -0.088874 | Yes |
| NEK2   | 36683 | -0.486579 | -0.060298 | Yes |
| PTTG1  | 36691 | -0.501135 | -0.030975 | Yes |
| CENPJ  | 36699 | -0.530558 | 8.18E-05  | Yes |

---

**Supplementary Table 5.** Rank-ordered list of potential centrosome aberrations-associated genes with associated rank metric scores, enrichment scores (ES), and whether each gene is part of the core enriched genes (i.e., the leading-edge subset) in the hypoxia-high group of the mitosis-activity-index-low cases of the Jonsdottir dataset.

| Experiment                                             |          | HIF-1 $\alpha$ | PIK4     | Cyclin-E | $\gamma$ -tubulin | Pericentrin | Aurora-A |
|--------------------------------------------------------|----------|----------------|----------|----------|-------------------|-------------|----------|
| Fig.4B-<br>Hypoxia<br>treatment                        | 231 NX   | 0.867309       | 1.088736 | 0.764054 | 0.940908          | 0.084236    | 0.941012 |
|                                                        | 231 HY   | 1.427749       | 1.458914 | 1.151796 | 1.314168          | 0.285311    | 1.181304 |
|                                                        | 468 NX   | 0.882063       | 1.088638 | 0.54138  | 0.12408           | 0.114685    | 0.812575 |
|                                                        | 468 HY   | 1.076276       | 1.74581  | 0.979746 | 1.0245            | 0.606658    | 1.044164 |
| Fig.5B-<br>Hypoxia<br>induced by<br>Cocl2<br>treatment | 231 Ctrl | 0.218511       | 0.832513 | 0.294373 | 0.592241          | 0.069429    | 0.832411 |
|                                                        | 231 Trt  | 1.239352       | 1.590948 | 2.493794 | 0.804104          | 1.931564    | 1.231247 |
|                                                        | 468 Ctrl | 0.28707        | 0.826657 | 1.873522 | 0.703674          | 0.29214     | 0.832097 |
|                                                        | 468 Trt  | 2.680947       | 1.305258 | 3.325025 | 1.267246          | 3.23625     | 1.262659 |
| Fig.5C-<br>HIF-1 $\alpha$ OE                           | 231 CV   | 0.747236       | 0.670742 | 0.85962  | 1.847637          | 1.476639    | 0.894344 |
|                                                        | 231 OE   | 1.72515        | 1.118433 | 1.09351  | 2.473519          | 2.492973    | 2.605576 |
|                                                        | 468 CV   | 0.621214       | 0.971311 | 0.088223 | 2.082607          | 3.132659    | 1.645612 |
|                                                        | 468 OE   | 3.075068       | 3.068379 | 1.171741 | 4.687624          | 4.226323    | 3.500129 |
| Fig.5C-<br>HIF-1 $\alpha$ KO                           | 231 CV   | 0.663849       | 0.968604 | 0.937503 | 1.094114          | 0.874438    | NA       |
|                                                        | 231 KO   | 0.219866       | 0.535841 | 0.535841 | 0.733562          | 0.799145    | NA       |
|                                                        | 468 CV   | 0.962027       | 0.937549 | 0.937549 | 1.094106          | 0.825789    | NA       |
|                                                        | 468 KO   | 0.392876       | 0.298447 | 0.298447 | 1.01252           | 0.717745    | NA       |
| Fig 6- Patient<br>tumor samples                        | Normal   | 0.562684       | 0.192416 | NA       | 0.065889          | 0.07082     | NA       |
|                                                        | TNBC     | 1.393741       | 1.526139 | NA       | 1.41868           | 1.661001    | NA       |
|                                                        | Normal   | 0.834917       | 0.182812 | NA       | 0.016321          | 0.182492    | NA       |
|                                                        | Non-TNBC | 3.165156       | 3.103829 | NA       | 1.419274          | 1.980062    | NA       |
| Supplementary<br>Fig.6 B-DMOG<br>treatment             | 231 Ctrl | 0.070699       | 0.129414 | 0.06178  | 0.102232          | 0.241046    | 0.244206 |
|                                                        | 231 Trt  | 0.730699       | 0.639978 | 0.959441 | 0.192495          | 0.931273    | 0.882121 |
|                                                        | 468 Ctrl | 0.201942       | 0.336708 | 0.109773 | 0.14167           | 0.226087    | 0.400704 |
|                                                        | 468 Trt  | 0.766199       | 0.685804 | 0.788588 | 0.166921          | 0.76518     | 0.888424 |
|                                                        | 231 Ctrl | 0.123484       | 0.080159 | 0.091875 | 0.129839          | 0.07909     | 0.117454 |

|                                                  |          |          |          |          |          |          |          |
|--------------------------------------------------|----------|----------|----------|----------|----------|----------|----------|
| Supplementary<br>Fig. 6 C-<br>MG132<br>treatment | 231 Trt  | 0.893662 | 0.491866 | 0.797712 | 0.908607 | 0.83877  | 0.691196 |
|                                                  | 468 Ctrl | 0.10509  | 0.089896 | 0.165372 | 0.341801 | 0.161174 | 0.1077   |
|                                                  | 468 Trt  | 0.537223 | 0.427091 | 0.534221 | 0.908613 | 0.923808 | 0.264049 |

**Supplementary Table 6:** Densitometry values relative to loading control  $\beta$ -actin calculated using Image-J for immunoblot assays provided in main manuscript and supplementary data.

## References

- 1 Kao, K.-J., Chang, K.-M., Hsu, H.-C. & Huang, A. T. Correlation of microarray-based breast cancer molecular subtypes and clinical outcomes: implications for treatment optimization. *BMC cancer* **11**, 143-143, doi:10.1186/1471-2407-11-143 (2011).
- 2 Jonsdottir, K. *et al.* Prognostic value of gene signatures and proliferation in lymph-node-negative breast cancer. *PLoS One* **9**, e90642, doi:10.1371/journal.pone.0090642 (2014).
- 3 Subramanian, A. *et al.* Gene set enrichment analysis: a knowledge-based approach for interpreting genome-wide expression profiles. *Proceedings of the National Academy of Sciences of the United States of America* **102**, 15545-15550, doi:10.1073/pnas.0506580102 (2005).
- 4 Eustace, A. *et al.* A 26-gene hypoxia signature predicts benefit from hypoxia-modifying therapy in laryngeal cancer but not bladder cancer. *Clinical cancer research : an official journal of the American Association for Cancer Research* **19**, 4879-4888, doi:10.1158/1078-0432.ccr-13-0542 (2013).



- 5 Buffa, F. M., Harris, A. L., West, C. M. & Miller, C. J. Large meta-analysis of multiple cancers reveals a common, compact and highly prognostic hypoxia metagene. *Br J Cancer* **102**, 428-435, doi:10.1038/sj.bjc.6605450 (2010).
- 6 Liberzon, A. *et al.* Molecular signatures database (MSigDB) 3.0. *Bioinformatics* **27**, 1739-1740, doi:10.1093/bioinformatics/btr260 (2011).
- 7 Matthews, L. *et al.* Reactome knowledgebase of human biological pathways and processes. *Nucleic acids research* **37**, D619-D622, doi:10.1093/nar/gkn863 (2009).
- 8 Rapley, J. *et al.* Coordinate Regulation of the Mother Centriole Component Nlp by Nek2 and Plk1 Protein Kinases. *Molecular and Cellular Biology* **25**, 1309-1324, doi:10.1128/mcb.25.4.1309-1324.2005 (2005).
- 9 Schneeweiss, A. *et al.* Centrosomal aberrations in primary invasive breast cancer are associated with nodal status and hormone receptor expression. *International journal of cancer. Journal international du cancer* **107**, 346-352, doi:10.1002/ijc.11408 (2003).
- 10 Huang, Z. *et al.* MiCroKiTS 4.0: a database of midbody, centrosome, kinetochore, telomere and spindle. *Nucleic acids research* **43**, D328-D334, doi:10.1093/nar/gku1125 (2015).
- 11 Carter, S. L., Eklund, A. C., Kohane, I. S., Harris, L. N. & Szallasi, Z. A signature of chromosomal instability inferred from gene expression profiles predicts clinical outcome in multiple human cancers. *Nat Genet* **38**, 1043-1048, doi:[http://www.nature.com/ng/journal/v38/n9/suppinfo/ng1861\\_S1.html](http://www.nature.com/ng/journal/v38/n9/suppinfo/ng1861_S1.html) (2006).
- 12 Camp, R. L., Dolled-Filhart, M. & Rimm, D. L. X-Tile: A New Bio-Informatics Tool for Biomarker Assessment and Outcome-Based Cut-Point Optimization. *Clinical Cancer Research* **10**, 7252-7259, doi:10.1158/1078-0432.ccr-04-0713 (2004).
